- and insulin action in human obesity, starvation, and refeeding. *J Clin Invest* 62:204–13, 1978
10. Mohan V, Ramachandran G, Kumar GV, Snehlatha C, Viswanathan M: Insulin resistance in fibrocalculus pancreatic diabetes. *Horm Metab Res* 20:746–48, 1988
11. Lager I, Lonnroth P, Von Schenck H, Smith U: Reversal of insulin resistance in type 1 diabetes after treatment with continuous subcutaneous insulin infusion. *Br Med J* 287:1661–64, 1983

## Hyperproinsulinemia in Type II Diabetes

ROBERT M. COHEN, MD  
DAVID M. NATHAN, MD  
REX S. CLEMENTS, JR, MD

For quite some time, there has been concern that hyperinsulinemia may be a risk factor for accelerated vascular disease in patients with non-insulin-dependent diabetes mellitus (type II) (1–4). More recently it has become apparent that proinsulin makes up an increased proportion of the measured immunoreactive insulin (IRI) in the sera of patients with type II diabetes (5–8). In nondiabetic subjects, the proinsulin-IRI ratio was in the range of 10–20%, whereas in patients with type II diabetes this ratio can exceed 50% (5–9). The possibility has been raised that proinsulin and its split products (rather than insulin itself) may be associated with the recognized cardiovascular risk factors in

type II diabetes (9). In addition, in a single study, an excess of myocardial infarctions was observed in patients with type II diabetes treated for 2 yr with exogenous intact human proinsulin (10).

Although the precise mechanisms responsible for hyperproinsulinemia in type II diabetes are poorly understood, it is predicted that the proinsulin-IRI ratio would be raised in patients with type II diabetes treated with sulfonylureas, but would be normalized if the  $\beta$ -cell was “put at rest” by the administration of exogenous insulin (6). To address this issue, we measured the fasting IRI, proinsulin, and proinsulin-IRI molar ratio in previously described patients with type II diabetes who were randomized to receive either an oral sulfonylurea (glyburide) or insulin injections (NPH insulin, once daily) (11). As indicated by their HbA<sub>1c</sub> percentages (Table 1), these two groups of patients achieved equivalent glycemic control within 1 mo of randomization.

Proinsulin measurements were performed using a modification (12) of our previously described assay using antiserum 11E (13). In this assay, des 31–32 proinsulin cross-reacts ~38% as well as intact proinsulin. Because des 64–65 proinsulin crossreactivity is only ~10% and because this product makes up a small fraction of the circulating proinsulin constituents (14–16), it provides a negligible contribution in this assay. In fasting, nondiabetic subjects, this assay gives a proinsulin-IRI molar ratio of  $18.6 \pm 3.5\%$ , whereas the mean proinsulin-IRI ratio was raised in our study subjects before randomization ( $35.7 \pm 1.9\%$ ,  $P < 0.001$  vs. control subjects).

**Table 1—Glycosylated hemoglobin, fasting immunoreactive insulin (IRI), proinsulin, and proinsulin-IRI molar ratio in patients with non-insulin-dependent diabetes treated for 1 mo with either sulfonylurea or insulin**

| TREATMENT GROUP                  | HbA <sub>1c</sub><br>(%) | IRI (pM)     | PROINSULIN<br>(pM) | PROINSULIN-IRI<br>RATIO (%) |
|----------------------------------|--------------------------|--------------|--------------------|-----------------------------|
| SULFONYLUREA-TREATED<br>(N = 14) | $8.3 \pm 1.4$            | $124 \pm 20$ | $41.4 \pm 8.3$     | $42.3 \pm 6.2$              |
| INSULIN-TREATED<br>(N = 7)       | $8.1 \pm 1.0$            | $104 \pm 12$ | $19.5 \pm 3.2$     | $22.3 \pm 2.4^*$            |

Values are means  $\pm$  SE.

\* $P < 0.01$  vs. sulfonylurea-treated group by a 2-sample *t* test.

FROM THE DEPARTMENT OF INTERNAL MEDICINE, UNIVERSITY OF CINCINNATI COLLEGE OF MEDICINE, CINCINNATI, OHIO; DEPARTMENT OF MEDICINE, MASSACHUSETTS GENERAL HOSPITAL AND HARVARD MEDICAL SCHOOL, BOSTON, MASSACHUSETTS; AND THE DEPARTMENT OF MEDICINE, UNIVERSITY OF PENNSYLVANIA SCHOOL OF MEDICINE, PHILADELPHIA, PENNSYLVANIA.

ADDRESS CORRESPONDENCE AND REPRINT REQUESTS TO REX S. CLEMENTS, JR, MD, NOVO NORDISK PHARMACEUTICALS INC., 100 OVERLOOK CENTER, PRINCETON, NJ 08540.

As shown in Table 1, there was no difference in the total fasting immunoreactive insulin between the two treatment groups. The absolute proinsulin concentration in the sulfonylurea-treated group was not statistically different from the insulin-treated group ( $P = 0.086$ ). However, the proinsulin-IRI molar ratio was elevated in the sulfonylurea-treated group ( $P < 0.01$ ), but was normalized among those treated with exogenous insulin.

If hyperproinsulinemia (rather than hyperinsulinemia) proves to be a risk factor for accelerated vascular disease, these preliminary data suggest that the abnormal elevation of proinsulin concentrations in patients with type II diabetes can be ameliorated by the administration of exogenous insulin but not by sulfonylureas.

#### References

1. Stout RW, Vallance-Owen J: Insulin and atheroma. *Lancet* 1:1078–80, 1969
2. Orchard TJ, Becker DJ, Bates M, Kuller LH, Drash AL: Plasma insulin and lipoprotein concentrations: an atherogenic association? *Am J Epidemiol* 118:326–37, 1983
3. Stout RW: Insulin and atheroma: 20-yr perspective. *Diabetes Care* 13:631–54, 1990
4. DeFronzo RA, Ferrannini E: Insulin resistance: a multifaceted syndrome responsible for NIDDM, obesity, hypertension, dyslipidemia, and atherosclerotic cardiovascular disease. *Diabetes Care* 14:173–94, 1991
5. Mako ME, Starr JI, Rubenstein AH: Circulating proinsulin in patients with maturity onset diabetes. *Amer J Med* 63:865–69, 1977
6. Ward WK, LaCava EC, Paquette TL, Beard JC, Wallum BJ, Porte D: Disproportionate elevation of immunoreactive proinsulin in Type 2 (non-insulin-dependent) diabetes mellitus and in experimental insulin resistance. *Diabetologia* 30:698–702, 1987
7. Yoshioka N, Kuzuya T, Matsuda A, Taniguchi M, Iwamoto Y: Serum proinsulin levels at fasting and after oral glucose load in patients with Type 2 (non-insulin-dependent) diabetes mellitus. *Diabetologia* 31:355–60, 1988
8. Saad MF, Kahn SE, Nelson RG, Pettitt DJ, Knowler WC, Schwartz MW, Kowalyk S, Bennett PM, Porte D: Disproportionately elevated proinsulin in Pima Indians with noninsulin-dependent diabetes mellitus. *J Clin Endocrinol & Metab* 70:1247–53, 1990
9. Nagi DK, Hendra TJ, Ryle AJ, Cooper TM, Temple RC, Clark PMS, Schneider AH, Hales CN, Yudkin JS: The relationships of concentrations of insulin, intact proinsulin and 32,33 split proinsulin with cardiovascular risk factors in Type 2 (non-insulin-dependent) diabetic subjects. *Diabetologia* 33:532–37, 1990
10. Galloway JA: Treatment of NIDDM with insulin agonists or substitutes. *Diabetes Care* 13:1209–39, 1990
11. Nathan DM, Roussel A, Godine JE: Glyburide or insulin for metabolic control in non-insulin-dependent diabetes mellitus: a randomized, double-blind study. *Ann Intern Med* 108:334–40, 1988
12. Bowsher RR, Apathy JM, Ferguson AL, Frank BH: An improved radioimmunoassay (RIA) for proinsulin in human serum and plasma (Abstract). *Diabetes* 36:94A, 1987
13. Cohen RM, Given BD, Licinio-Paixo J, Provow SA, Rue PA, Frank BH, Root MR, Polonsky KS, Tager HS, Rubenstein AH: Proinsulin radioimmunoassay in the evaluation of insulinomas and familial hyperproinsulinemia. *Metabolism* 35:1137–46, 1986
14. Given BD, Cohen RM, Schoelson SE, Frank BH, Rubenstein AM, Tager HS: Biochemical and clinical implications of proinsulin conversion intermediates. *J Clin Invest* 76:1398–1405, 1985
15. Temple RC, Carrington CA, Luzio SD, Owens DR, Sobey WJ, Hales CN: Insulin deficiency in non-insulin-dependent diabetes. *Lancet* 1:293–95, 1989
16. Sobey WJ, Beer SF, Carrington CA, Clark PMS, Frank BH, Gray IP, Luzio SD, Owens DR, Schneider AE, Siddle K, Temple RC, Hales CN: Sensitive and specific two-site immunoradiometric assays for human insulin, proinsulin, 65–66 split and 32–33 split proinsulins. *Biochem J* 260:535–41, 1989
